# Supplementary material for: Subconfluent ARPE-19 Cells Display Mesenchymal Cell-State Characteristics and Behave like Fibroblasts, Rather Than Epithelial Cells, in Experimental HCMV Infection Studies
Source: MDPI journal article supplement (doi:10.3390/v16010049), 2023-12-28
Supplement: s1 [file s1]

**Table S3. Antibodies used in this study.**

| Antibody                                           | Dilution | Source                                                  | Identifier                       |
|----------------------------------------------------|----------|---------------------------------------------------------|----------------------------------|
| Mouse monoclonal anti-E-Cadherin                   | 1:500    | BD Biosciences                                          | Cat# 610181;<br>RRID: AB_397580  |
| Goat polyclonal anti-EPCAM                         | 1:500    | R & D Systems                                           | Cat# AF960;<br>RRID: AB_355745   |
| Mouse monoclonal anti- $\beta$ -tubulin            | 1:2000   | The Developmental Studies<br>Hybridoma Bank             | Cat# E7;<br>RRID: AB_528499      |
| Mouse monoclonal anti-Vimentin                     | 1:1000   | The Developmental Studies<br>Hybridoma Bank             | Cat# AMF-17b;<br>RRID: AB_528505 |
| Goat polyclonal anti-Snail                         | 1:500    | R & D Systems                                           | Cat# AF3639;<br>RRID: AB_2191738 |
| Rabbit polyclonal anti-OB-Cadherin                 | 1:500    | Cell Signaling Technology                               | Cat# 4442; RRID:<br>AB_10547881  |
| Mouse monoclonal anti-N-Cadherin                   | 1:500    | Cell Signaling Technology                               | Cat# 14215; RRID:<br>AB_2798427  |
| Mouse monoclonal anti-IE1<br>(clone 1B12)          | 1:1000   | Shenk lab, Princeton University<br>(Zhu et al., 1995)   | N/A                              |
| Mouse monoclonal anti-UL99/pp28<br>(clone 10B4-29) | 1:1000   | Shenk lab, Princeton University<br>(Silva et al., 2003) | N/A                              |
| Mouse monoclonal anti-UL83/pp65<br>(clone 8F5)     | 1:1000   | Shenk lab, Princeton University<br>(Nowak et al., 1984) | N/A                              |
