# Supplementary material for: Subconfluent ARPE-19 Cells Display Mesenchymal Cell-State Characteristics and Behave like Fibroblasts, Rather Than Epithelial Cells, in Experimental HCMV Infection Studies
Source: MDPI journal article supplement (doi:10.3390/v16010049), 2023-12-28
Supplement: s1 [file s1]

**Table S2. qRT-PCR primers used in this study.**

| Primer name  | Sequence                 | Source              |
|--------------|--------------------------|---------------------|
| VIM-fwd      | GAGAACTTTGCCGTTGAAGC     | (Mani et al., 2008) |
| VIM-rev      | GCTTCCTGTAGGTGGCAATC     | (Mani et al., 2008) |
| CDH1-fwd     | TGTTCACCATTAACAGGAACAC   | This study          |
| CDH1-rev     | GGGTATACGTAGGGAAACTCTC   | This study          |
| CDH2-fwd     | TCAGTGAAGGAGTCAGCAG      | This study          |
| CDH2-rev     | CTTCTGCCTTTGTAGGTGG      | This study          |
| CDH11-fwd    | GCTGACTTGTGAATGGGAC      | This study          |
| CDH11-rev    | TTGAGCTCATCACGTCAGG      | This study          |
| FN1-fwd      | AAATGGCCAGATGATGAGC      | This study          |
| FN1-rev      | TAACACGTTGCCTCATGAG      | This study          |
| FBN1-fwd     | TAGGATGTGCAAAGATGAGG     | This study          |
| FBN1-rev     | ATGAGGTTCTTGCATTCCA      | This study          |
| PPIA-fwd     | AGCCAGGTACTTGGTGCTACAGTC | This study          |
| PPIA-rev     | TGCAGGTAGTCTGCGCCTTAAC   | This study          |
| C1orf116-fwd | CTCTGTCTCCATCTCTGCC      | This study          |
| C1orf116-rev | GCTATCACTCTCCACTGGG      | This study          |
| EPCAM-fwd    | CGAGTGAGAACCTACTGGA      | This study          |
| EPCAM-rev    | TGATCTCCTTCTGAAGTGCA     | This study          |
| GJB3-fwd     | CTCATCATTGAGTTCCTCTTCC   | This study          |
| GJB3-rev     | GCATATTGAAGCCATGCCA      | This study          |
| MARVELD3-fwd | AGAGATATCTGCCCTCGAC      | This study          |
| MARVELD3-rev | TCTGACTGGTAATATTCCACCTC  | This study          |
| ST14-fwd     | CATGGAACATTGAGGTGCC      | This study          |
| ST14-rev     | ATCTCCACGTAGTCCTTGG      | This study          |
| OVOL2-fwd    | AAATCAAGTTCACCACAGGC     | This study          |
| OVOL2-rev    | ACTTGAGGTGACGGTTCAG      | This study          |
| SNAI-fwd     | TCTTTCCTCGTCAGGAAGC      | This study          |
| SNAI-rev     | AGGTAAACTCTGGATTAGAGTCC  | This study          |
